# Supplementary material for: Application of novel multiple-dimensional cobalt oxides as the electroactive material on supercapacitors
Source: Royal Society of Chemistry journal article supplement (doi:10.1039/c6ra10219k), 2016-01-01
Supplement: c6ra10219k1.pdf [file c6ra10219k1.pdf]

# Electronic Supplementary Information

## Application of the Novel Multiple-Dimensional Cobalt Oxides as the Electroactive Material on Supercapacitors

*Wei-Lung Hong,<sup>1†</sup> Lu-Yin Lin,<sup>\*1†</sup> Yu-Pin Liu,<sup>1</sup> Lu-Ying Lin,<sup>1</sup> and Chao-Chi Tu<sup>1</sup>*

<sup>1</sup>Department of Chemical Engineering and Biotechnology, National Taipei University of Technology

(Taipei Tech), Taipei 10608, Taiwan

<sup>†</sup>These authors contributed equally.

<sup>\*</sup>Corresponding author (Dr. L. Y. Lin): E-mail: [lylin@ntut.edu.tw](mailto:lylin@ntut.edu.tw)

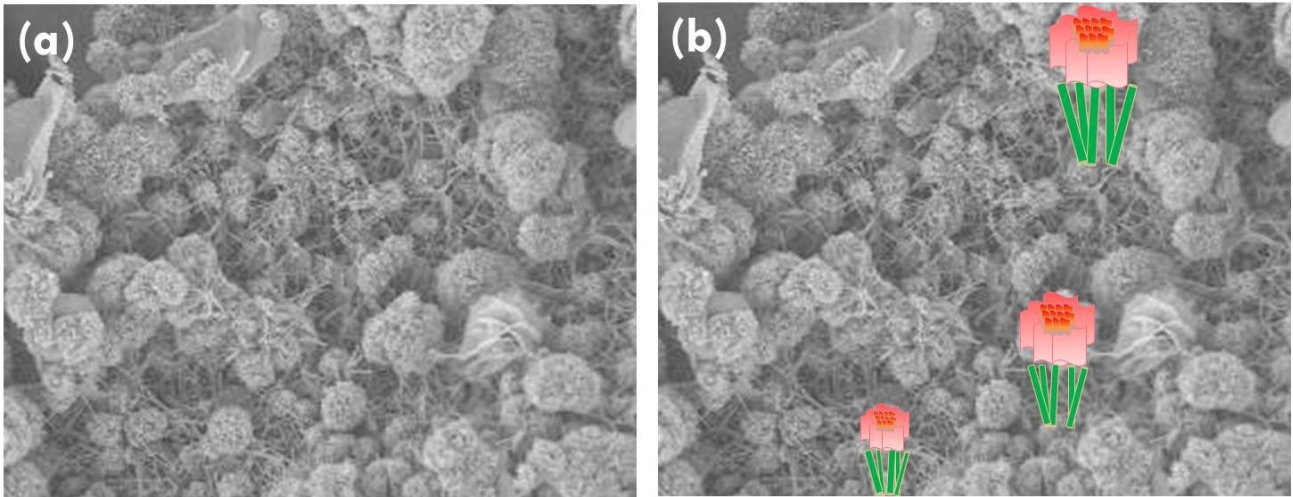

**Figure S1** (a) The cross-sectional SEM image for the cobalt oxide/nickel foam electrode, and (b) the same SEM image as (a) with the cartoons of nanoflowers and nanostems inserted.

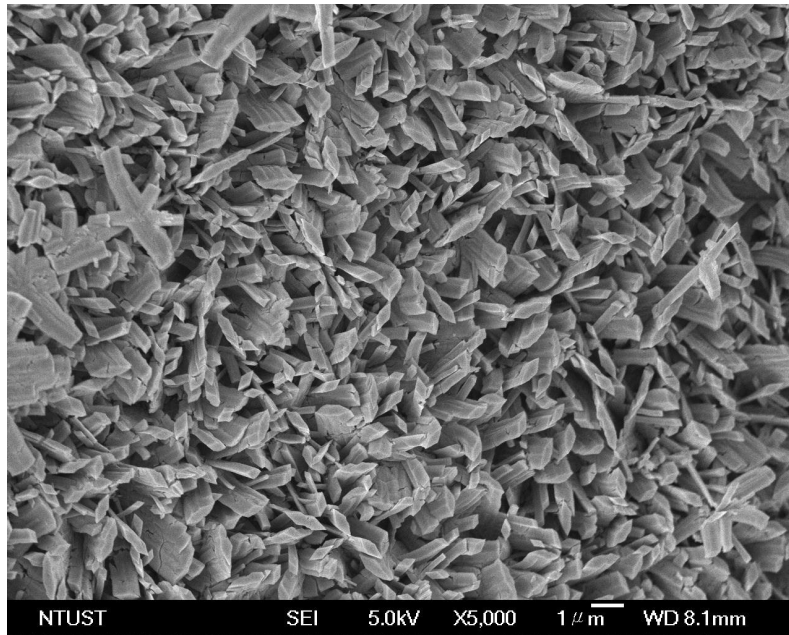

**Figure S2** The SEM image for the cobalt oxide grown on the nickel foam in the one-step hydrothermal reaction.

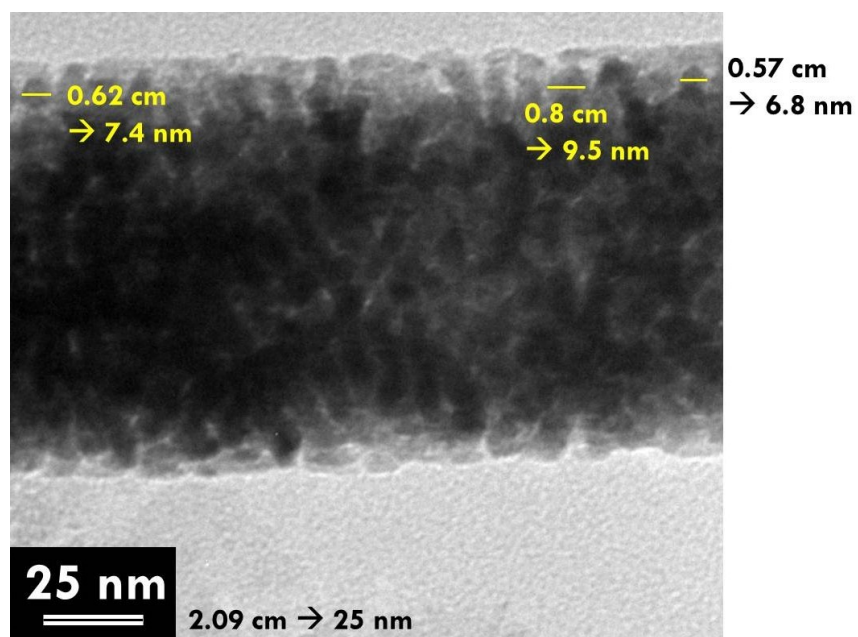

**Figure S3** The TEM image and the inserted lines for estimating the sizes of the nanoparticles.
